# Supplementary material for: Highly enantioselective alkaloid synthesis via ene-type cyclizations catalyzed by cationic chiral palladium(ii) complexes of PN-ligands with an achiral oxazoline unitElectronic supplementary information (ESI) available: spectral data of substrates, cyclized products and PN-ligands and crystallographic data of Pd complexes. See http://www.rsc.org/suppdata/ob/b3/b305865b/
Source: Royal Society of Chemistry journal article supplement (doi:10.1039/b305865b), 2003-01-01
Supplement: b305865b.doc [file b305865b.doc]

# Supplementary data

Highly Enantioselective Alkaloids Synthesis *via* Ene-type Cyclizations Catalyzed by Cationic Chiral Palladium(II) Complexes of PN-ligands with an *Achiral* Oxazoline Unit

Manabu Hatanoand Koichi Mikami[*]

[*] Prof. Dr. K. Mikami, Dr. M. Hatano

Department of Applied Chemistry

Graduate School of Science and Engineering

Tokyo Institute of Technology

O-okayama, Meguro-ku, Tokyo 152-8552 (Japan)

Fax: Int. code (+81)3-5734-2776

E-mail: [kmikami@o.cc.titech.ac.jp](mailto:kmikami@o.cc.titech.ac.jp)

General:

1H NMR, 13C NMR and 31P NMR spectra were measured on a Varian GEMINI 300 (300 MHz) and Varian GEMINI 400 (400 MHz) spectrometers. Chemical shift of 1H NMR were expressed in parts per million downfield from tetramethylsilane as an internal standard (= 0) in CDCl3, unless otherwise noted. Chemical shifts of 13C NMR were expressed in parts per million downfield from CDCl3 as an internal standard (= 77.1) in CDCl3, unless otherwise noted. Chemical shifts of 31P NMR were expressed in parts per million downfield from 85% H3PO4 as an internal standard (= 0) in CDCl3, unless otherwise noted. IR spectra were measured on a JASCO FT/IR-5000 spectrometer. Optical rotations were measured on a JASCO DIP-370. Liquid chromatographic analyses (HPLC) were conducted on a JASCO PU-980, LG-980-02, DG-980-50, AS-950 and CO-966 instrument equipped with model UV-975 spectrometers as an ultra violet light. Peak area were calculated by JASCO-BORWIN (Windows NT) as an automatic integrator. Capillary gas chromatographic analyses (GC) were conducted on a Shimadzu GC-14B instrument equipped with FID detector by using N2 (75 kPa) as a carrier gas; Peak area were calculated by a Shimadzu C-R6A as an automatic integrator; Chiral column were CP-Cyclodextrin--2,3,6-M-19 (i.d. 0.25 mm x 25 m; CHROMPACK; GL Sciences Inc.) and CP-Chirasil-Dex CB (i.d. 0.32 mm x 25 m; CHROMPACK; GL Sciences Inc.); Split ratio was 100:1. Analytical thin layer chromatography (TLC) were performed on a glass plates (Merck Kieselgal 60 F254, layer thickness 0.25 and 0.2 mm). Visualization was accomplished by UV light (254 nm), anisaldehyde, KMnO4 and phosphomolybdic acid. Column chromatography was performed on KANTO Silica Gel 60N (spherical, neutral). All experiments were carried out under argon atmosphere otherwise noted.

Materials:

[(MeCN)4Pd](BF4)2 and [Pd(3-C3H5)(-Cl)]2 were purchased from Aldrich Chemical Co.

4-[(2-Methyl-but-2-enyl)-(toluene-4-sulfonyl)-amino]-but-2-ynoic acid methyl ester (1a).

1H NMR (300 MHz, CDCl3)

 1.58-1.66 (6H), 2.41 (s, 3H), 3.66 (s, 2H), 4.09 (s, 2H), 5.46 (m, 1H), 7.30 (d, *J* = 8.1 Hz, 2H), 7.71 (d, *J* = 8.4 Hz, 2H).

13C NMR (75 MHz, CDCl3)

 13.6, 13.6, 21.5, 35.1, 52.7, 54.9, 76.9, 80.8, 125.9, 127.7, 129.4, 129.7, 135.5, 143.8, 153.0.

IR (neat)

2958, 2922, 2866, 2244, 1717, 1601, 1437, 1450, 153, 1164 cm-1.

[4-Methyl-1-(toluene-4-sulfonyl)-4-vinyl-pyrrolidin-3-ylidene]-acetic acid methyl ester (2a).

1H NMR (300 MHz, CDCl3)

 1.27 (s, 3H), 2.43 (s, 3H), 3.09 (d, *J* = 9.6 Hz, 1H), 3.14 (d, *J* = 9.0 Hz, 1H), 3.68 (s, 3H), 4.19 (dd, *J* = 18.0, 2.7 Hz, 1H), 4.41 (dd, *J* = 18.3, 2.4 Hz, 1H), 5.15 (d, *J* = 11.1 Hz, 1H), 5.16 (d, *J* = 17.4 Hz, 1H), 5.60 (t, *J* = 2.7 Hz, 1H), 5.69 (dd, *J* = 17.4, 10.8 Hz, 1H), 7.33 (d, *J* = 8.1 Hz, 2H), 7.72 (d, *J* = 8.1 Hz, 2H).

13C NMR (75 MHz, CDCl3)

 21.6, 23.1, 49.8, 51.5, 52.2, 58.3, 112.9, 115.4, 128.0, 129.8, 140.2, 143.9, 164.3, 166.3.

IR (neat)

2928, 2856, 1715 1667, 1601, 1437, 1340 cm-1.

HPLC analysis (DAICEL CHIRALCEL OD-H, eluent, hexane/2-propanol = 95/5, flow rate 0.6 mL / min, 15 ℃, detection 254 nm light)

*t*R: 23.8 min ((*R*)-isomer) and 26.6 min ((*S*)-isomer).

[]D23 = + 15.47 (*c* = 0.865 in CHCl3); 87%ee product (*S*).

**4-[(3-Methyl-but-2-enyl)-(toluene-4-sulfonyl)-amino]-but-2-ynoic acid methyl ester (1b).**

1H NMR (300 MHz, CDCl3)

 1.65 (s, 3H), 1.71 (s, 3H), 2.41 (s, 3H), 3.68 (s, 3H), 3.77 (d, *J* = 7.2 Hz, 2H), 4.16 (s, 2H), 5.07 (m, *J* = 7.2 Hz, 1H), 7.30 (d, *J* = 8.4 Hz, 2H), 7.71 (d, *J* = 8.7 Hz, 2H).

13C NMR (75 MHz, CDCl3)

 17.9, 21.5, 25.9, 35.9, 44.4, 52.7, 76.7, 81.1, 117.4, 127.7, 129.7, 135.5, 139.8, 143.8, 153.0.

IR (neat)

2922, 2242, 1715, 1435, 1340, 1251, 1158 cm-1.

[4-Isopropenyl-1-(toluene-4-sulfonyl)-pyrrolidin-3-ylidene]-acetic acid methyl ester (2b).

1H NMR (300 MHz, CDCl3)

 1.56 (s, 3H), 2.43 (s, 3H), 3.06 (m, 1H), 3.47 (m, 1H), 3.52 (m, 1H), 3.69 (s, 3H), 4.15 (dm, *J* = 18.0 Hz, 1H), 4.42 (dd, *J* = 18.3, 2.1 Hz, 1H), 4.86 (s, 1H), 4.92 (m. 1H), 5.66 (m, *J* = 2.1 Hz, 1H), 7.33 (d, *J* = 7.8 Hz, 2H), 7.73 (d, *J* = 8.1 Hz, 2H).

13C NMR (75 MHz, CDCl3)

 18.6, 21.6, 50.6, 51.5, 52.5, 52.7, 113.9, 116.2, 128.0, 129.8, 132.4, 141.3, 143.9, 159.7, 166.2.

IR (neat)

2926, 1717, 1437, 1350, 1218, 1166 cm-1.

HPLC analysis (DAICEL CHIRALCEL AD-H, eluent, hexane/2-propanol = 95/5, flow rate 0.6 mL / min, 15 ℃, detection 254 nm light)

*t*R: 42.6 min ((*S*)-isomer) and 45.2 min ((*R*)-isomer).

[]29(Na 589 nm) = - 10.891 (*c* = 2.110 in CHCl3). (66% *ee* sample from (a*S*)-PN-ligand **5**.

4-[Cyclopent-1-enylmethyl-(toluene-4-sulfonyl)-amino]-but-2-ynoic acid methyl ester (8a).

1H NMR (300 MHz, CDCl3)

 1.80-1.96 (2H), 2.41 (s, 3H), 2.20-2.40 (4H), 3.69 (s, 3H), 3.84 (s, 2H), 4.77 (s, 2H), 5.66 (m, 1H), 7.30 (d, *J* = 8.1 Hz, 2H), 7.72 (d, *J* = 8.4 Hz, 2H).

13C NMR (75 MHz, CDCl3)

 21.5, 23.4, 32.5, 33.0, 35.7, 47.2, 52.7, 76.8, 80.8, 127.7, 129.7, 131.3, 135.4, 137.8, 143.9, 153.9.

IR (neat)

2958, 2852, 2242, 1717, 1601, 1437, 1350, 1259, 1162, 1094 cm-1.

[2-(Toluene-4-sulfonyl)-2-aza-spiro[4.4]non-6-en-4-ylidene]-acetic acid methyl ester (9a).

1H NMR (300 MHz, CDCl3)

 1.87 (m, *J* = 13.2, 7.5 Hz, 1H), 2.13 (m, *J* = 12.9, 7.5 Hz, 1H), 2.36-2.46 (2H), 2.42 (3H), 2.82 (d, *J* = 9.3 Hz, 1H), 3.33 (d, *J* = 9.3 Hz, 1H), 3.67 (s, 3H), 4.06 (dd, *J* = 18.0, 2.7 Hz, 1H), 4.51 (dd, *J* = 18.3, 3.0 Hz, 1H), 5.30 (dt, *J* = 5.7, 2.1 Hz, 1H), 5.56 (t, *J* = 2.4 Hz, 1H), 5.98 (dt, *J* = 5.7, 2.1 Hz, 1H), 7.33 (d, *J* = 8.7 Hz, 2H), 7.72 (d, *J* = 8.7 Hz, 2H).

13C NMR (75 MHz, CDCl3)

 21.6, 31.6, 39.0, 51.4, 52.4, 57.0, 60.9, 111.7, 128.1, 129.8, 131.9, 131.9, 135.7, 143.9, 165.7, 166.5.

HPLC analysis (DAICEL CHIRALCEL OD-H, eluent, hexane/2-propanol = 95/5, flow rate 0.6 mL / min, 15 ℃, detection 254 nm light)

*t*R: 22.8 min ((*R*)-isomer) and 26.3 min ((*S*)-isomer).

IR (neat)

2954, 2856, 1715, 1667, 1599, 1437, 1350, 1162, 1093, 1042, 1017 cm-1.

[2-(Toluene-4-sulfonyl)-2-aza-spiro[4.4]non-7-en-4-ylidene]-acetic acid methyl ester (10a).

1H NMR (300 MHz, CDCl3)

 2.42 (s, 3H), 2.49 (4H), 3.12 (s, 2H), 3.67 (s, 3H), 4.31 (2H), 5.63 (s, 2H), 5.69 (t, *J* = 2.7 Hz, 1H), 7.33 (d, *J* = 8.7 Hz, 2H), 7.72 (d, *J* = 8.7 Hz, 2H).

13C NMR (75 MHz, CDCl3)

 21.6, 45.4, 51.4, 52.8, 57.0, 59.6, 110.2, 128.1, 128.6, 129.8, 131.9, 148.9, 165.7, 166.5.

4-[Cyclohex-1-enylmethyl-(toluene-4-sulfonyl)-amino]-but-2-ynoic acid methyl ester (8b).

1H NMR (300 MHz, CDCl3)

 1.50-1.65 (4H), 1.90-2.05 (4H), 2.39 (s, 3H), 3.62 (s, 2H), 3.67 (s, 3H), 4.10 (s, 2H), 5.65 (m, 1H), 7.28 (d, *J* = 8.1 Hz, 2H), 7.70 (d, *J* = 8.4 Hz, 2H).

13C NMR (75 MHz, CDCl3)

 21.5, 22.1, 22.4, 25.2, 25.9, 35.2, 52.6, 53.4, 76.8, 80.8, 127.6, 128.3, 129.6, 131.3, 135.5, 143.8, 153.0.

IR (neat)

2926, 2862, 2242, 1717, 1601, 1437, 1330, 1253, 1164, 1098, 1067, 1040 cm-1.

[2-(Toluene-4-sulfonyl)-2-aza-spiro[4.5]dec-6-en-4-ylidene]-acetic acid methyl ester (9b).

1H NMR (300 MHz, CDCl3)

 1.20-2.20 (6H), 2.42 (s, 3H), 2.70 (d, *J* = 9.6 Hz,1H), 3.47 (d, *J* = 9.0 Hz,1H), 3.68 (s, 3H), 4.02 (dd, *J* = 18.3, 2.7 Hz,1H), 4.54 (dd, *J* = 18.3, 2.4 Hz,1H), 5.14 (dm, *J* = 10.2 Hz, 1H), 5.60 (t, *J* = 2.4 Hz, 1H), 5.95 (dt, *J* = 9.9, 3.6 Hz, 1H), 7.33 (d, *J* = 7.8 Hz, 2H), 7.72 (d, *J* = 8.1 Hz, 2H).

13C NMR (75 MHz, CDCl3)

19.0, 21.6, 24.8, 34.0, 48.7, 51.4, 51.9, 57.7, 113.3, 127.5, 128.0, 129.8, 132.2, 132.3, 143.8, 165.6, 166.4.

IR (neat)

2934, 2862, 1715, 1131, 1599, 1437, 1352, 1222, 1166, 1094, 1044 cm-1.

HPLC analysis (DAICEL CHIRALCEL OD-H(double connected), eluent, hexane/2-propanol = 94/6, flow rate 0.6 mL / min, 15 ℃, detection 254 nm light)

*t*R: 39.2 min ((*R*)-isomer) and 45.3 min ((*S*)-isomer).

[2-(Toluene-4-sulfonyl)-2-aza-spiro[4.5]dec-7-en-4-ylidene]-acetic acid methyl ester (10b).

1H NMR (300 MHz, CDCl3)

 1.20-2.30 (6H), 2.42 (s, 3H), 3.00 (d, *J* = 9.0 Hz,1H), 3.10 (d, *J* = 9.3 Hz,1H), 3.68 (s, 3H), 4.25 (dd, *J* = 18.3, 2.7 Hz,1H), 4.35 (dd, *J* = 18.3, 2.7 Hz,1H), 5.66 (t, *J* = 3.0 Hz, 1H), 5.56-5.75 (m, 2H), 7.32 (d, *J* = 7.8 Hz, 2H), 7.71 (d, *J* = 8.1 Hz, 2H).

13C NMR (75 MHz, CDCl3, selected)

 21.6, 22.7, 30.3, 34.8, 46.0, 51.4, 52.6, 56.5, 111.7, 124.7, 126.8, 128.0, 129.8, 132.3, 143.8, 165.9, 166.5.

IR (neat)

2928, 2846, 1717, 1665, 1599, 1437, 1348, 1224, 1164, 1096, 1046 cm-1.

HPLC analysis (DAICEL CHIRALCEL AD, eluent, hexane/2-propanol = 90/10, flow rate 0.6 mL / min, 15 ℃, detection 254 nm light)

*t*R: 27.3 min ((*S*)-isomer) and 30.5 min ((*R*)-isomer).

4-[Cyclohept-1-enylmethyl-(toluene-4-sulfonyl)-amino]-but-2-ynoic acid methyl ester (8c).

1H NMR (300 MHz, CDCl3)

 1.20-1.60 (6H), 2.06-2.24 (4H), 2.41 (s, 3H), 3.63 (s, 2H), 3.68 (s, 3H), 4.13 (s, 2H), 5.78 (t, *J* = 6.3 Hz, 1H), 7.29 (d, *J* = 7.8 Hz, 2H), 7.71 (d, *J* = 8.7 Hz, 2H).

13C NMR (75 MHz, CDCl3)

 21.5, 26.7, 26.9, 28.5, 30.0, 32.4, 35.2, 52.7, 55.1, 76.9, 80.7, 127.7, 127.7, 129.7, 133.6, 137.4, 143.8, 153.0.

[2-(Toluene-4-sulfonyl)-2-aza-spiro[4.6]undec-6-en-4-ylidene]-acetic acid methyl ester (9c).

1H NMR (300 MHz, CDCl3)

 0.80-2.30 (8H), 2.43 (s, 3H), 2.74 (d, *J* = 9.0 Hz,1H), 3.60 (d, *J* = 9.0 Hz,1H), 3.69 (s, 3H), 4.05 (dd, *J* = 18.3, 2.4 Hz, 1H), 4.48 (dd, *J* = 18.6, 2.7 Hz, 1H), 5.17 (d, *J* = 11.7 Hz, 1H), 5.86 (dd, *J* = 11.7, 5.7 Hz, 1H),7.33 (d, *J* = 8.4 Hz, 2H), 7.72 (d, *J* = 8.1 Hz, 2H).

HPLC analysis (DAICEL CHIRALCEL OD-H, eluent, hexane/2-propanol = 95/5, flow rate 0.6 mL / min, 15 ℃, detection 254 nm light)

*t*R: 20.0 min ((*R*)-isomer) and 21.7 min ((*S*)-isomer).

[2-(Toluene-4-sulfonyl)-2-aza-spiro[4.6]undec-7-en-4-ylidene]-acetic acid methyl ester (10c).

1H NMR (300 MHz, CDCl3)

 0.80-2.30 (8H), 2.43 (s, 3H), 3.04 (d, *J* = 9.6 Hz,1H), 3.14 (d, *J* = 9.3 Hz,1H), 3.69 (s, 3H), 4.30 (2H), 5.60 (m, 1H), 5.67 (t, *J* = 2.7 Hz, 1H), 5.95 (m, 1H), 7.33 (d, *J* = 8.4 Hz, 2H), 7.72 (d, *J* = 8.1 Hz, 2H).

13C NMR (75 MHz, CDCl3, selected)

 111.1, 127.1, 128.0, 128.8, 129.8, 130.9, 134.8, 166.6, 167.5.

IR (neat)

2928, 2858, 1715, 1663, 1599, 1437, 1350, 1270, 1212, 1166, 1094, 1048 cm-1.

HPLC analysis (DAICEL CHIRALCEL OD-H, eluent, hexane/2-propanol = 95/5, flow rate 0.6 mL / min, 15 ℃, detection 254 nm light)

*t*R: 27.8 min ((*R*)-isomer) and 28.5 min ((*S*)-isomer).

4-[Cyclooct-1-enylmethyl-(toluene-4-sulfonyl)-amino]-but-2-ynoic acid methyl ester (8d).

1H NMR (300 MHz, CDCl3)

 1.20-1.60 (8H), 2.06-2.24 (4H), 2.41 (s, 3H), 3.68 (s, 3H), 3.68 (s, 2H), 4.14 (s, 2H), 5.59 (t, *J* = 8.4 Hz, 1H), 7.30 (d, *J* = 7.8 Hz, 2H), 7.73 (d, *J* = 8.1 Hz, 2H).

IR (neat)

2926, 1719, 1352, 1255, 1164 cm-1.

[2-(Toluene-4-sulfonyl)-2-aza-spiro[4.7]dodec-6-en-4-ylidene]-acetic acid methyl ester (9d).

1H NMR (300 MHz, CDCl3)

 0.80-2.30 (10H), 2.43 (s, 3H), 2.76 (d, *J* = 9.3 Hz,1H), 3.60 (d, *J* = 9.3 Hz,1H), 3.68 (s, 3H), 4.04 (dd, *J* = 18.3, 2.7 Hz,1H), 4.47 (dd, *J* = 18.3, 2.7 Hz,1H), 5.20 (d, *J* = 12.0 Hz,1H), 5.59 (dt, *J* = 11.7, 8.7 Hz,1H), 5.66 (t, *J* = 2.7 Hz, 1H), 7.33 (d, *J* = 8.1 Hz, 2H), 7.73 (d, *J* = 7.8 Hz, 2H).

IR (neat)

2930, 1723, 1665, 1468, 1367, 1270, 1222, 1166 cm-1.

HPLC analysis (DAICEL CHIRALCEL OD-H, eluent, hexane/2-propanol = 96/4, flow rate 0.6 mL / min, 15 ℃, detection 254 nm light)

*t*R: 21.7 min ((*R*)-isomer) and 25.5 min ((*S*)-isomer).

[2-(Toluene-4-sulfonyl)-2-aza-spiro[4.7]dodec-7-en-4-ylidene]-acetic acid methyl ester (10d).

1H NMR (300 MHz, CDCl3)

 0.80-2.30 (10H), 2.43 (s, 3H), 2.96 (d, *J* = 9.3 Hz,1H), 3.23 (d, *J* = 9.3 Hz,1H), 3.68 (s, 3H), 4.22 (dd, *J* = 18.3, 2.4 Hz,1H), 4.39 (dd, *J* = 18.3, 2.4 Hz,1H), 5.64 (t, *J* = 2.4 Hz, 1H), 5.53 (m,1H), 5.85 (m,1H), 7.33 (d, *J* = 8.1 Hz, 2H), 7.73 (d, *J* = 7.8 Hz, 2H).

HPLC analysis (DAICEL CHIRALCEL OD-H, eluent, hexane/2-propanol = 96/4, flow rate 0.6 mL / min, 15 ℃, detection 254 nm light)

*t*R: 28.3 min ((*S*)-isomer) and 30.8 min ((*R*)-isomer).

4-[Cyclopentadec-1-enylmethyl-(toluene-4-sulfonyl)-amino]-but-2-ynoic acid methyl ester (8e).

1H NMR (300 MHz, CDCl3)

 1.10-1.50 (22H), 2.03 (4H), 2.41 (s, 3H), 3.68 (s, 3H), 3.68 (s, 2H), 4.10 (s,2H), 5.39 (t, *J* = 7.5 Hz, 1H), 7.30 (d, *J* = 8.4 Hz, 2H), 7.72 (d, *J* = 8.1 Hz, 2H).

13C NMR (75 MHz, CDCl3)

 21,6, 25.9, 26.0, 26.3, 26.3 26.7, 26.9, 26.9, 27.1, 27.2, 27.3, 27.4, 27.6, 28.0, 35.1, 52.7, 53.0, 65.9, 80.8, 127.7, 129.7, 132.7, 132.9, 135.5, 143.8, 153.0.

IR (neat)

2928, 2860, 2242, 1717, 1601, 1437, 1352, 1251, 1162, 1093 cm-1.

[2-(Toluene-4-sulfonyl)-2-aza-spiro[4.14]nonadec-6-en-4-ylidene]-acetic acid methyl ester (9e).

1H NMR (300 MHz, CDCl3)

 0.80-1.60 (22H), 1.96-2.24 (2H), 2.42 (s, 3H), 3.04 (d, *J* = 9.3 Hz,1H), 3.29 (d, *J* = 9.3 Hz,1H), 3.68 (s, 3H), 4.26 (d, *J* = 2.7 Hz,2H), 5.23 (d, *J* = 15.9 Hz,1H), 5.44 (dt, *J* = 15.6, 6.6 Hz,1H), 5.61 (t, *J* = 2.7 Hz,1H), 7.33 (d, *J* = 7.8 Hz, 2H), 7.73 (d, *J* = 8.4 Hz, 2H).

13C NMR (75 MHz, CDCl3)

 23.6, 25.3, 26.5, 26.7, 26.8, 27.1, 27.1, 27.1, 27.7, 28.3, 31.9, 37.4, 51.3, 53.2, 72.1, 76.2, 110.1, 131.6, 132.1, 166.9, 169.7.

IR (neat)

2930, 2860, 1717, 1665, 1462, 1437, 1354, 1220, 1168 cm-1.

HPLC analysis (DAICEL CHIRALCEL OD-H, eluent, hexane/2-propanol = 97/3, flow rate 0.6 mL / min, 15 ℃, detection 254 nm light)

*t*R: 16.7 min ((*R*)-isomer) and 18.9 min ((*S*)-isomer).

[]25(Na 589 nm) = - 8.39 (*c* = 1.000 in CHCl3). (84% *ee* sample from (*S*)-Me2-PN-ligand)

4-[(3,6-Dihydro-2*H*-pyran-4-ylmethyl)-(toluene-4-sulfonyl)-amino]

-but-2-ynoic acid methyl ester (11).

1H NMR (300 MHz, CDCl3)

 2.11 (m, 2H), 2.41 (s, 3H), 3.68 (s, 3H), 3.71 (s, 2H), 3.77 (t, *J* = 5.4 Hz, 2H), 4.11 (m, 2H), 4.13 (s, 2H), 5.72 (s, 1H), 7.30 (d, *J* = 8.1 Hz, 2H), 7.71 (d, *J* = 8.1 Hz, 2H).

13C NMR (75 MHz, CDCl3)

 21.5, 26.2, 35.6, 52.3, 52.7, 60.4, 64.1, 65.2, 80.4, 126.4, 127.7, 129.6, 129.8, 135.3, 144.1, 152.9.

IR (neat)

2960, 2928, 2838, 2244, 1717, 1437, 1350, 1253 cm-1.

[2-(Toluene-4-sulfonyl)-8-oxa-2-aza-spiro[4.5]dec-6-en-4-ylidene]

-acetic acid methyl ester (12).

1H NMR (300 MHz, CDCl3)

 1.72 (m, 1H), 2.05 (m, 1H), 2.43 (s, 3H), 2.69 (d, *J* = 9.6 Hz, 1H), 3.46 (d, *J* = 9.6 Hz, 1H), 3.68 (s, 3H), 3.85-4.10 (2H), 3.98 (dd, *J* = 18.3, 2.4 Hz, 1H), 4.23 (d, *J* = 6.3 Hz, 1H), 4.59 (dd, *J* = 18.3, 2.4 Hz, 1H), 5.73 (t, *J* = 3.0 Hz, 1H), 6.57 (d, *J* = 6.3 Hz, 1H), 7.34 (d, *J* = 8.1 Hz, 2H), 7.72 (d, *J* = 7.8 Hz, 2H).

13C NMR (75 MHz, CDCl3)

 21.6, 34.0, 44.6, 51.5, 51.8, 58.3, 62.8, 101.1, 113.6, 128.0, 129.9, 132.1, 144.0, 147.6, 165.0, 166.3.

IR (neat)

2930, 1717, 1644, 1352, 1247, 1166 cm-1.

HPLC analysis (DAICEL CHIRALCEL AD-H, eluent, hexane/2-propanol = 85/15, flow rate 1.0 mL / min, 28 ℃, detection 254 nm light)

*t*R: 16.0 min ((*S*)-isomer) and 23.5 min ((*R*)-isomer).

[]29(Na 589 nm) = + 76.008 (*c* = 0.850 in CHCl3). (93% *ee* sample from (*S*)-DM-PN-ligand)

**(3-Allyl)[(a*S*)-2-[4,4-dimethyl-oxazol-2-yl]-2’-diphenylphosphino**

**-1,1’-binaphthyl]palladium(II) hexafluoroantimonate (7).**

A mixture of allylpalladium(II) chloride dimer (5.1 mg, 0.0139 mmol) and PN-ligand (16.0 mg, 0.0306 mmol) and silver hexafluoroantimnate (AgSbF6) (12.4 mg, 0.0372 mmol) in CH2Cl2 (2 mL) was stirred for 2 h at room temperature, then the resulting mixture was filtrated with Celite. The filtrate was concentrated under reduced pressure. The yellow residue (>90% yield) was dissolved in a minimum amount of CH2Cl2 and Et2O and hexane, and recrystalized at room temperature to afford colorless prismatic crystals.

31P NMR (161 MHz, CDCl3)

 26.58 (s, 1P).

*X-ray analysis of 7*

Bond Lengths(Å)

Sb1 F4 1.842(4)

Sb1 F2 1.862(4)

Sb1 F3 1.862(4)

Sb1 F6 1.866(3)

Sb1 F1 1.867(3)

Sb1 F5 1.869(3)

Pd1 N1 2.096(4)

Pd1 C40 2.106(5)

Pd1 C39 2.156(6)

Pd1 C38 2.209(4)

Pd1 P1 2.3046(11)

P1 C21 1.817(5)

P1 C27 1.821(5)

P1 C2 1.837(4)

O1 C33 1.336(5)

O1 C35 1.461(6)

N1 C33 1.262(6)

N1 C34 1.479(6)

C1 C2 1.388(6)

C1 C9 1.434(5)

C1 C11 1.493(6)

C2 C3 1.410(6)

C3 C4 1.377(6)

C4 C10 1.404(7)

C5 C6 1.355(8)

C5 C10 1.431(6)

C6 C7 1.418(9)

C7 C8 1.360(7)

C8 C9 1.420(6)

C9 C10 1.417(6)

C11 C12 1.381(6)

C11 C19 1.432(6)

C12 C13 1.411(6)

C12 C33 1.483(6)

C13 C14 1.369(8)

C14 C20 1.427(8)

C15 C16 1.360(8)

C15 C20 1.409(7)

C16 C17 1.389(8)

C17 C18 1.353(7)

C18 C19 1.424(6)

C19 C20 1.416(7)

C21 C26 1.380(6)

C21 C22 1.405(6)

C22 C23 1.371(8)

C23 C24 1.379(8)

C24 C25 1.374(9)

C25 C26 1.379(8)

C27 C28 1.386(8)

C27 C32 1.390(7)

C28 C29 1.377(8)

C29 C30 1.401(10)

C30 C31 1.375(10)

C31 C32 1.383(7)

C34 C37 1.509(8)

C34 C36 1.523(7)

C34 C35 1.553(7)

C38 C39 1.405(9)

C39 C40 1.359(9)

Bond Angles(o)

F4 Sb1 F2 179.7(2)

F4 Sb1 F3 90.4(3)

F2 Sb1 F3 89.5(2)

F4 Sb1 F6 90.3(2)

F2 Sb1 F6 90.0(2)

F3 Sb1 F6 90.35(17)

F4 Sb1 F1 90.6(2)

F2 Sb1 F1 89.45(19)

F3 Sb1 F1 179.0(2)

F6 Sb1 F1 89.60(16)

F4 Sb1 F5 89.0(2)

F2 Sb1 F5 90.6(2)

F3 Sb1 F5 90.00(17)

F6 Sb1 F5 179.30(19)

F1 Sb1 F5 90.06(17)

N1 Pd1 C40 168.1(2)

N1 Pd1 C39 134.0(2)

C40 Pd1 C39 37.2(2)

N1 Pd1 C38 100.39(18)

C40 Pd1 C38 68.3(2)

C39 Pd1 C38 37.5(2)

N1 Pd1 P1 96.74(10)

C40 Pd1 P1 94.25(16)

C39 Pd1 P1 127.5(2)

C38 Pd1 P1 162.30(16)

C21 P1 C27 104.3(2)

C21 P1 C2 104.52(19)

C27 P1 C2 107.5(2)

C21 P1 Pd1 118.06(15)

C27 P1 Pd1 104.13(15)

C2 P1 Pd1 117.21(14)

C33 O1 C35 105.7(4)

C33 N1 C34 108.9(4)

C33 N1 Pd1 120.3(3)

C34 N1 Pd1 130.8(3)

C2 C1 C9 119.3(4)

C2 C1 C11 121.1(4)

C9 C1 C11 119.6(4)

C1 C2 C3 120.4(4)

C1 C2 P1 119.9(3)

C3 C2 P1 119.7(3)

C4 C3 C2 120.6(4)

C3 C4 C10 120.6(4)

C6 C5 C10 120.8(5)

C5 C6 C7 119.8(4)

C8 C7 C6 121.1(5)

C7 C8 C9 120.6(5)

C10 C9 C8 118.5(4)

C10 C9 C1 119.5(4)

C8 C9 C1 122.0(4)

C4 C10 C9 119.5(4)

C4 C10 C5 121.3(5)

C9 C10 C5 119.1(5)

C12 C11 C19 118.1(4)

C12 C11 C1 120.5(4)

C19 C11 C1 121.3(4)

C11 C12 C13 122.3(4)

C11 C12 C33 119.4(4)

C13 C12 C33 118.2(4)

C14 C13 C12 119.5(5)

C13 C14 C20 120.8(5)

C16 C15 C20 120.9(5)

C15 C16 C17 120.1(5)

C18 C17 C16 121.0(5)

C17 C18 C19 120.9(5)

C20 C19 C18 117.7(4)

C20 C19 C11 120.0(4)

C18 C19 C11 122.2(4)

C15 C20 C19 119.3(5)

C15 C20 C14 121.8(5)

C19 C20 C14 119.0(4)

C26 C21 C22 119.3(5)

C26 C21 P1 121.3(4)

C22 C21 P1 119.4(4)

C23 C22 C21 120.1(5)

C22 C23 C24 120.5(5)

C25 C24 C23 119.2(6)

C24 C25 C26 121.5(6)

C25 C26 C21 119.5(5)

C28 C27 C32 118.5(5)

C28 C27 P1 119.2(4)

C32 C27 P1 121.5(4)

C29 C28 C27 121.1(6)

C28 C29 C30 119.5(6)

C31 C30 C29 120.1(5)

C30 C31 C32 119.7(6)

C31 C32 C27 121.2(5)

N1 C33 O1 117.4(4)

N1 C33 C12 126.3(4)

O1 C33 C12 116.3(4)

N1 C34 C37 112.6(4)

N1 C34 C36 107.7(4)

C37 C34 C36 111.8(5)

N1 C34 C35 100.7(4)

C37 C34 C35 113.3(4)

C36 C34 C35 110.1(5)

O1 C35 C34 103.6(4)

C39 C38 Pd1 69.2(3)

C40 C39 C38 122.6(7)

C40 C39 Pd1 69.4(3)

C38 C39 Pd1 73.3(3)

C39 C40 Pd1 73.4(3)

Torsion Angles(o)

N1 Pd1 P1 C21 -120.75(19)

C40 Pd1 P1 C21 63.9(3)

C39 Pd1 P1 C21 45.7(3)

C38 Pd1 P1 C21 73.8(6)

N1 Pd1 P1 C27 124.24(19)

C40 Pd1 P1 C27 -51.1(3)

C39 Pd1 P1 C27 -69.3(3)

C38 Pd1 P1 C27 -41.2(6)

N1 Pd1 P1 C2 5.66(19)

C40 Pd1 P1 C2 -169.7(3)

C39 Pd1 P1 C2 172.1(3)

C38 Pd1 P1 C2 -159.8(6)

C40 Pd1 N1 C33 -140.7(11)

C39 Pd1 N1 C33 -102.8(5)

C38 Pd1 N1 C33 -122.2(4)

P1 Pd1 N1 C33 62.3(3)

C40 Pd1 N1 C34 42.6(13)

C39 Pd1 N1 C34 80.5(5)

C38 Pd1 N1 C34 61.1(4)

P1 Pd1 N1 C34 -114.5(4)

C9 C1 C2 C3 1.1(6)

C11 C1 C2 C3 178.4(4)

C9 C1 C2 P1 -179.4(3)

C11 C1 C2 P1 -2.1(5)

C21 P1 C2 C1 65.6(4)

C27 P1 C2 C1 176.0(3)

Pd1 P1 C2 C1 -67.2(3)

C21 P1 C2 C3 -114.9(4)

C27 P1 C2 C3 -4.5(4)

Pd1 P1 C2 C3 112.2(3)

C1 C2 C3 C4 -0.3(7)

P1 C2 C3 C4 -179.8(4)

C2 C3 C4 C10 -0.6(7)

C10 C5 C6 C7 1.7(8)

C5 C6 C7 C8 -0.7(9)

C6 C7 C8 C9 -1.5(8)

C7 C8 C9 C10 2.7(7)

C7 C8 C9 C1 -177.3(4)

C2 C1 C9 C10 -1.0(6)

C11 C1 C9 C10 -178.3(4)

C2 C1 C9 C8 179.0(4)

C11 C1 C9 C8 1.7(6)

C3 C4 C10 C9 0.7(7)

C3 C4 C10 C5 -177.5(4)

C8 C9 C10 C4 -179.9(4)

C1 C9 C10 C4 0.0(6)

C8 C9 C10 C5 -1.7(6)

C1 C9 C10 C5 178.3(4)

C6 C5 C10 C4 177.7(5)

C6 C5 C10 C9 -0.5(7)

C2 C1 C11 C12 76.6(5)

C9 C1 C11 C12 -106.1(5)

C2 C1 C11 C19 -100.6(5)

C9 C1 C11 C19 76.7(5)

C19 C11 C12 C13 5.9(7)

C1 C11 C12 C13 -171.5(4)

C19 C11 C12 C33 -174.5(4)

C1 C11 C12 C33 8.2(6)

C11 C12 C13 C14 -1.9(8)

C33 C12 C13 C14 178.5(5)

C12 C13 C14 C20 -2.8(9)

C20 C15 C16 C17 0.1(9)

C15 C16 C17 C18 1.7(9)

C16 C17 C18 C19 -1.3(9)

C17 C18 C19 C20 -0.7(8)

C17 C18 C19 C11 -179.9(5)

C12 C11 C19 C20 -5.2(6)

C1 C11 C19 C20 172.1(4)

C12 C11 C19 C18 173.9(4)

C1 C11 C19 C18 -8.8(6)

C16 C15 C20 C19 -2.1(8)

C16 C15 C20 C14 178.7(6)

C18 C19 C20 C15 2.4(7)

C11 C19 C20 C15 -178.4(5)

C18 C19 C20 C14 -178.4(5)

C11 C19 C20 C14 0.8(7)

C13 C14 C20 C15 -177.5(6)

C13 C14 C20 C19 3.3(9)

C27 P1 C21 C26 108.4(4)

C2 P1 C21 C26 -138.8(4)

Pd1 P1 C21 C26 -6.5(5)

C27 P1 C21 C22 -69.9(4)

C2 P1 C21 C22 42.9(4)

Pd1 P1 C21 C22 175.2(3)

C26 C21 C22 C23 -0.5(8)

P1 C21 C22 C23 177.8(4)

C21 C22 C23 C24 -0.7(9)

C22 C23 C24 C25 1.6(11)

C23 C24 C25 C26 -1.2(11)

C24 C25 C26 C21 0.0(11)

C22 C21 C26 C25 0.9(8)

P1 C21 C26 C25 -177.4(5)

C21 P1 C27 C28 -176.4(4)

C2 P1 C27 C28 73.0(4)

Pd1 P1 C27 C28 -52.0(4)

C21 P1 C27 C32 -6.6(5)

C2 P1 C27 C32 -117.2(4)

Pd1 P1 C27 C32 117.8(4)

C32 C27 C28 C29 0.7(8)

P1 C27 C28 C29 170.8(5)

C27 C28 C29 C30 -1.7(9)

C28 C29 C30 C31 1.8(10)

C29 C30 C31 C32 -0.9(9)

C30 C31 C32 C27 -0.1(9)

C28 C27 C32 C31 0.2(8)

P1 C27 C32 C31 -169.6(4)

C34 N1 C33 O1 -5.9(5)

Pd1 N1 C33 O1 176.7(3)

C34 N1 C33 C12 174.9(4)

Pd1 N1 C33 C12 -2.5(6)

C35 O1 C33 N1 -7.5(5)

C35 O1 C33 C12 171.8(4)

C11 C12 C33 N1 -92.3(6)

C13 C12 C33 N1 87.4(6)

C11 C12 C33 O1 88.5(5)

C13 C12 C33 O1 -91.9(5)

C33 N1 C34 C37 136.3(5)

Pd1 N1 C34 C37 -46.6(6)

C33 N1 C34 C36 -99.9(5)

Pd1 N1 C34 C36 77.1(6)

C33 N1 C34 C35 15.4(5)

Pd1 N1 C34 C35 -167.6(3)

C33 O1 C35 C34 16.4(5)

N1 C34 C35 O1 -18.7(5)

C37 C34 C35 O1 -139.2(4)

C36 C34 C35 O1 94.8(5)

N1 Pd1 C38 C39 156.9(4)

C40 Pd1 C38 C39 -27.1(4)

P1 Pd1 C38 C39 -37.8(8)

Pd1 C38 C39 C40 51.2(5)

N1 Pd1 C39 C40 -167.9(4)

C38 Pd1 C39 C40 -135.5(7)

P1 Pd1 C39 C40 31.0(6)

N1 Pd1 C39 C38 -32.4(6)

C40 Pd1 C39 C38 135.5(7)

P1 Pd1 C39 C38 166.4(3)

C38 C39 C40 Pd1 -52.8(6)

N1 Pd1 C40 C39 47.0(14)

C38 Pd1 C40 C39 27.4(5)

P1 Pd1 C40 C39 -155.8(5)

(a*S*,*S*)-2-(2'-Diphenylphosphanyl-[1,1']binaphthalenyl-2-yl)-4-methyl

-4,5-dihydro-oxazole ((a*S*,*S*)-5).

1H NMR (300 MHz, CDCl3)

 0.88 (d, *J* = 6.6 Hz, 3H), 3.22 (t, *J* = 8.1 Hz, 1H), 3.73 (dd, *J* = 9.3, 7.8 Hz, 1H), 3.93 (m, 1H), 6.91 (d, *J* = 8.1 Hz, 1H), 6.96-7.09 (3H), 7.09-7.30 (10H), 7.35-7.52 (3H), 7.86 (d, *J* = 8.7 Hz, 2H), 7.89 (d, *J* = 9.3 Hz, 1H), 8.00 (d, *J* = 8.7 Hz, 1H), 8.20 (d, *J* = 8.4 Hz, 1H).

31P NMR (109 MHz, CDCl3)

 -15.06 (s, 1P)

IR (neat)

3056, 2968, 2928, 1632, 1479, 1435 cm-1.

**(3-Allyl)[(a*S*,*S*)-2-[4-methyl-oxazol-2-yl]-2’-diphenylphosphino**

**-1,1’-binaphthyl]palladium(II) hexafluoroantimonate.**

A mixture of allylpalladium(II) chloride dimer (5.2 mg, 0.0142 mmol) and PN-ligand (16.9 mg, 0.0315 mmol) and silver hexafluoroantimnate (AgSbF6) (12.8 mg, 0.0372 mmol) in CH2Cl2 (2 mL) was stirred for 2 h at room temperature, then the resulting mixture was filtrated with Celite. The filtrate was concentrated under reduced pressure. The yellow residue (>90% yield) was dissolved in a minimum amount of CH2Cl2 and AcOEt and hexane, and recrystalized at room temperature to afford colorless prismatic crystals.

31P NMR (161 MHz, CDCl3)

 26.4 (s, 1P(60%)), 26.0 (s, 1P(40%)).

(a*S*,*R*)-2-(2'-Diphenylphosphanyl-[1,1']binaphthalenyl-2-yl)-4-methyl

-4,5-dihydro-oxazole ((a*S*,*R*)-4).

1H NMR (300 MHz, CDCl3)

 0.93 (d, *J* = 6.3 Hz, 3H), 3.16 (t, *J* = 7.2 Hz, 1H), 3.68-3.86 (2H), 6.96-7.30 (10 H), 7.40-7.60 (2H), 7.80-8.22 (6H).

31P NMR (109 MHz, CDCl3)

 -14.83 (s, 1P)

**(3-Allyl)[(a*S*,*R*)-2-[4-methyl-oxazol-2-yl]-2’-diphenylphosphino**

**-1,1’-binaphthyl]palladium(II) hexafluoroantimonate.**

A mixture of allylpalladium(II) chloride dimer (2.2 mg, 0.000592 mmol) and PN-ligand (6.8 mg, 0.001303 mmol) and silver hexafluoroantimnate (AgSbF6) (5.3 mg, 0.001540 mmol) in CH2Cl2 (2 mL) was stirred for 1 h at room temperature, then the resulting mixture was filtrated with Celite. The filtrate was concentrated under reduced pressure. The yellow residue (>90% yield) was dissolved in a minimum amount of CH2Cl2 and AcOEt and hexane, and recrystalized at room temperature to afford colorless prismatic crystals.

**(3-Allyl)[(a*S*)-2-(oxazol-2-yl)-2’-diphenylphosphino**

**-1,1’-binaphthyl]palladium(II) hexafluoroantimonate.**

A mixture of allylpalladium(II) chloride dimer (2.0 mg, 0.00555 mmol) and PN-ligand (6.2 mg, 0.0122 mmol) and silver hexafluoroantimnate (AgSbF6) (4.9 mg, 0.0144 mmol) in CH2Cl2 (2 mL) was stirred for 1 h at room temperature, then the resulting mixture was filtrated with Celite. The filtrate was concentrated under reduced pressure. The yellow residue (>90% yield) was dissolved in a minimum amount of CH2Cl2 and AcOEt/hexane/ether, and recrystalized at room temperature to afford colorless prismatic crystals.

31P NMR (161 MHz, CDCl3)

 -25.44 (s, 1P(42%)), -25.98 (s, 1P(57%)).
